# A new protocol for multiple muscle mapping using nTMS

Fang Jin, Sjoerd Bruijn\*, Andreas Daffertshofer

Faculty of Behavioural and Movement Sciences, Department of Human Movement Sciences, Vrije Universiteit, Institute of Brain and Behavior Amsterdam and Amsterdam Movement Sciences, Van der Boechorststraat 9, 1081 BT Amsterdam, The Netherlands

\* Corresponding author: [s.m.bruijn@vu.nl](mailto:s.m.bruijn@vu.nl)

Keywords: nTMS, motor mapping, multiple muscles, cortical representation, active area

## Abstract

**Background:** Single-pulse transcranial magnetic stimulation is a safe and non-invasive tool for investigating cortical representation of muscles in the primary motor cortex. While non-navigated TMS has been successfully applied to simultaneously induce motor-evoked potentials (MEPs) in multiple muscles, a more rigorous assessment of the corresponding cortical representation can greatly benefit from navigated transcranial magnetic stimulation (nTMS).

**Objective:** We designed a protocol to map the entire precentral gyrus using neural navigation while recording responses of eight muscles simultaneously. Here, we evaluated the feasibility, validity, and reliability of this protocol.

**Method:** Twenty participants underwent conventional (i.e., muscle-based, grid-constrained) and gyrus-based nTMS mapping. For both protocols, we investigated three different stimulation intensities during two consecutive sessions.

**Results:** The gyrus-based nTMS mapping was received well by all participants and was less time consuming than the grid-constrained standard. On average, MEP amplitudes, latencies, and centre-of-gravity and size of the active areas largely agreed across protocols supporting validity. Intraclass coefficients between sessions underscored the reliability of our protocol.

**Conclusion:** We designed an nTMS protocol for the simultaneous mapping multiple muscles on the cortex. The protocol takes only about ten minutes per participant when including as many as eight muscles. Our assessments revealed that the cortical representation of multiple muscles can be determined with high validity and reliability.

## 36 Introduction

37 Single-pulse transcranial magnetic stimulation (TMS) is a non-invasive and painless technique that al-  
38 lows for monitoring neurophysiological alterations of the human motor cortex [1, 2]. When a TMS coil  
39 discharges at a suitable intensity, the time-varying magnetic field will induce transient currents caus-  
40 ing depolarisation of axons of nerve cells [3]. This will elicit a motor-evoked potential (MEP), which  
41 can be recorded in contralateral target muscles. Amplitudes and latencies of these MEPs can reveal  
42 the excitability and conduction times of the cortical-spinal tract. Both have been conceived as valid  
43 parameters of TMS motor mapping [4]. Neuroscientists and physicians alike utilised TMS motor map-  
44 ping to evaluate motor cortical plasticity [5], to plan brain tumour surgery [6] and to follow the recov-  
45 ery after stroke [7]. There is ample evidence that the maximum MEP elicited using TMS is closer to the  
46 site found using direct cortical stimulation – the gold standard in motor mapping – than that found  
47 using magnetoencephalography (MEG) [8] and functional magnetic resonance imaging (fMRI) [9].

48 In traditional TMS motor mapping procedures, a grid is printed on a cap worn by the subject. This grid  
49 serves to manoeuvre the coil and stimulate at the adequate position [10, 11]. Navigated TMS (nTMS)  
50 has been developed to substitute the cap, yet the grid-based positions remain. The grid can be dis-  
51 played on an anatomical scan (typically an MRI) allowing to position the coil according to neuroana-  
52 tomy. This reduces the error from relative movements of cap and head [12]. That advance has been  
53 improved by also accounting for the orientation of the coil, next to the mere positioning [13]. The  
54 most recent addition in nTMS systems has been positioning with instantly assessed electromyography  
55 (EMG), to display MEP parameters (almost) online on the stimulated sites of the cortex. By this, one  
56 can, e.g., create a map of MEP amplitudes for a certain muscle during an experiment (rather than  
57 during post-processing) [14].

58 These advances in technology have led to improvements in experimental protocols. As said, for TMS  
59 without neural navigation, a grid on a cap serves to guide coil positioning [10]. In nTMS, the grid can  
60 be readily repositioned around the so-called hotspot of a target muscle, i.e. the centre of the area of  
61 interest for subsequent assessments, e.g., with different stimulation intensities [15, 16] quantified  
62 relative to the muscle-specific resting motor threshold (RMT) [17]. Littmann and co-workers [18] de-  
63 signed an optimal grid by increasing the number of points over the precentral gyrus and reducing the  
64 number of points far away from it. Despite these improvements, however, it remains a challenge to  
65 move the coil between closely neighbouring points. Van De Ruit, Perenboom, Grey [19] compared  
66 grid-based procedures to a protocol in which stimulations were applied at pseudorandom positions.  
67 Not only did this alternative approach reduce the time needed to map a single muscle, it turned out  
68 to be as reliable as the conventional procedures; see also Cavaleri, Schabrun, Chipchase [20].

69 Identifying the cortical map of multiple muscles in one experimental run will be difficult – if at all  
70 possible – without neural navigation [10]. Yet, studies exploiting nTMS for that sake are few and far  
71 between – see [21] for an exception where up to four muscles were targeted. The focus on single  
72 muscle mapping arguably stems from the fact that – in most nTMS protocols – stimulation intensities  
73 at a specific percentage of a single muscle's RMT are deemed important. Detecting RMTs for several  
74 muscles is laborious because it often involves offline EMG analyses. Quite recently, however, it has  
75 been shown that the RMT of a small hand muscle (there, the first dorsal interosseous, FDI) may be  
76 similar to the RMT of all upper extremity muscles [16].

77 All these developments led us to design a new nTMS-based protocol for multiple muscles on the pre-  
78 central gyrus (primary motor cortex). Here, we illustrate its feasibility, validity, and reliability. As will  
79 be shown, our mapping protocol significantly reduces operation times and drastically simplifies pro-  
80 cedures. By the same token, it comes with proper validity and reliability. The protocol can provide  
81 information about the cortical representations of multiple muscles and the degree to which they over-  
82 lap. For this, we also submit a new way to define and measure the so-called active area. Through our  
83 research, we anticipate changing the nTMS paradigm in research and clinic: from grid- to gyrus-based  
84 and from single to multiple muscle mapping.

## 85 **Materials and methods**

### 86 *Participants*

87 Twenty healthy, right-handed volunteers (average age:  $29.55 \pm 7.49$ , eight females) participated in the  
88 study. Prior to the experiment, all participants were screened for contraindications of MRI and TMS  
89 through questionnaires [22]. All of them provided signed informed consent. The Edinburgh Handed-  
90 ness Inventory was used to determine hand dominance [23]. The study had been approved by the  
91 medical ethics committee of Amsterdam University Medical Center (VUmc, 018.213 -  
92 NL65023.029.18).

### 93 *Materials*

94 Our set-up consisted of three devices: a TMS system, an EMG amplifier, and a neural navigator. Single-  
95 pulse TMS was delivered by a Magstim 200<sup>2</sup> stimulator (Magstim Company Ltd., Whitland, Dyfed, UK)  
96 using a figure-of-eight coil with 70 mm windings. Eight bipolar EMG signals were recorded using a 16-  
97 channel EMG amplifier (Porti, TMSi, Oldenzaal, the Netherlands) and continuously sampled at a rate  
98 of 2 kHz. The EMG recordings were triggered by the TMS to allow for online EMG-assessments using  
99 a custom-made Labview-programme with embedded Matlab functions (designed at our department  
100 using Labview 2016, National Instruments, Austin, TX, and Matlab 2018b, The MathWorks, Natick,

101 MA). In brief, upon receiving a trigger, peak-to-peak amplitudes and latencies of MEPs were estimated  
102 from all EMG signals during the following 500 ms. These parameters, as well as the original EMG sig-  
103 nals (duration = 500 ms), were sent to the neural navigation software (Neural Navigator, Brain Science  
104 Tools, De Bilt, The Netherlands, [www.brainsciencetools.com](http://www.brainsciencetools.com)) for online monitoring and storage. The  
105 neural navigation software also stored the position and orientation of the coil with respect to the head.  
106 Prior to running the TMS protocol, we acquired the participants' anatomical T1-weighted MRI (3 Tesla  
107 Philips Achieva System, Philips, Best, The Netherlands; matrix size  $256 \times 256 \times 211$ , voxel size  
108  $1.0 \times 1.0 \times 1.0 \text{ mm}^3$ , TR/TE 6.40/2.94 ms). The MRI grey matter was segmented using SPM (SPM12,  
109 <https://www.fil.ion.ucl.ac.uk/spm/software/spm12/>).  
110 We considered the first dorsal interosseous (FDI), abductor digiti minimi (ADM), abductor pollicis  
111 brevis (APB), flexor pollicis brevis (FPB), extensor digitorum communis (EDC), flexor digitorum super-  
112 ficialis (FDS), extensor carpi radialis (ECR) and flexor carpi radialis (FCR) muscles, which were measured  
113 using bipolar electrodes (Blue Sensor N-00-S, Ambu, Ballerup, Denmark), placed after cleaning the skin  
114 with alcohol; cf. Figure 1. The ground electrode was attached to the ulnar styloid process. We moni-  
115 tored and kept the electrode impedance below 5 k $\Omega$ . During the experiment, the orientation of the  
116 TMS coil was held 45 degrees to the sagittal plane, tangential to the scalp. By this, we meant to induce  
117 currents in the cortex along the posterior-to-anterior direction. To control the TMS output, we modi-  
118 fied the employed Matlab-toolbox (<https://github.com/armanabraham/Rapid2>) when adjusting in-  
119 tensities and intervals between stimulations.

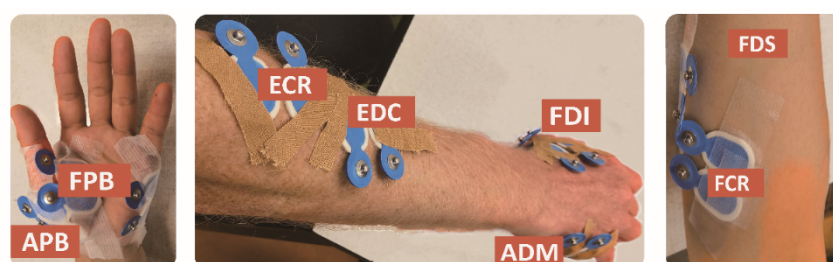

**Figure 1.** Placement of bipolar electrodes for the first dorsal interosseous (FDI), abductor digiti minimi (ADM), abductor pollicis brevis (APB), flexor pollicis brevis (FPB), extensor digitorum communis (EDC), flexor digitorum superficialis (FDS), extensor carpi radialis (ECR) and flexor carpi radialis (FCR) muscles.

## 120 *Experimental procedures*

121 Participants were comfortably seated in an armchair, relaxing muscles of hands and arms. The exper-  
122 iment consisted of two identical sessions, which were separated by one hour to test for test-retest  
123 reliability of our outcomes – electrodes were kept fixed to minimise placement errors. The interval of  
124 one hour only was set to prevent drying of the conductive electrolyte gel. Each session contained three

125 parts: (1) Testing the RMTs for FDI, EDC and FCR; there, we stimulated thirty points near the omega-  
126 shaped area of the precentral gyrus to identify the respective hotspots defined as the coordinates for  
127 which the largest peak-to-peak amplitudes in the corresponding EMG signals could be observed. This  
128 served to determine the RMTs for the three target muscles following [24] (i.e. the stimulator output  
129 at which peak-to-peak amplitudes were higher than 50µV in five out of ten stimuli). (2) We conducted  
130 two sets of stimulations to map the representations of all eight muscles using three intensities each,  
131 namely 105% RMT of FDI, EDC and FCR, respectively. For the first set, we adopted the conventional  
132 grid-based method [25] using a square grid (5 cm × 5 cm) with either the FDI-, EDC- or FCR-hotspot as  
133 the centre and applied 80 stimuli. This was immediately followed by a pseudorandom positioning over  
134 the whole gyrus (40 stimuli), yielding a total of 80+40=120 stimuli – in the following we consider the  
135 total of 120 stimuli for our gyrus-based approach while the grid mapping contained only the first 80  
136 stimuli. (3) We analysed the last 40 stimulations and estimated the hotspots of the other five muscles  
137 (ADM, APB, FPB, FDS and ECR) and determined their RMTs.

### 138 *Offline data processing*

139 During the measurement, peak-to-peak amplitudes and latencies of the MEPs were estimated. The  
140 MEP was defined as the range between the minimum and maximum peak of the EMG signal, and the  
141 latency as the onset of the MEP signal (<https://github.com/marlow17/surfaceanalysis>). The onset was  
142 defined as the point in time at which the signal exceeded mean ± 1.96×sd of the signal baseline  
143 (100 ms prior to up to the moment of stimulus).

144 For every muscle and stimulation, we determined whether a MEP was elicited; see *Supplementary*  
145 *Material* for details. Whenever MEPs were present, the corresponding parameters were included  
146 when computing the mean MEP amplitude and latency, the centre-of-gravity of the stimulation sur-  
147 face ( $CoG_{x,y,z}$ ) and the size of the active area, i.e., the size of that surface. We defined the centre-of-  
148 gravity as follows [26]:

$$149 \quad CoG_x = \frac{\sum MEP_i \cdot X_i}{\sum MEP_i}, \quad CoG_y = \frac{\sum MEP_i \cdot Y_i}{\sum MEP_i}, \quad \text{and} \quad CoG_z = \frac{\sum MEP_i \cdot Z_i}{\sum MEP_i}.$$

150 Here,  $MEP_i$  represents the peak-to-peak amplitude for stimulation  $i$  at position  $(X_i, Y_i, Z_i)$ . The defi-  
151 nition of the active area is more involved, but we provide more details in the *Supplementary Material*.  
152 All the analyses were performed separately for the  $3 \times 2 \times 2$  cases: three different muscle-specific in-  
153 tensities, for grid- and gyrus-based mapping, and for both sessions. The different steps are illustrated  
154 in Figure 2.

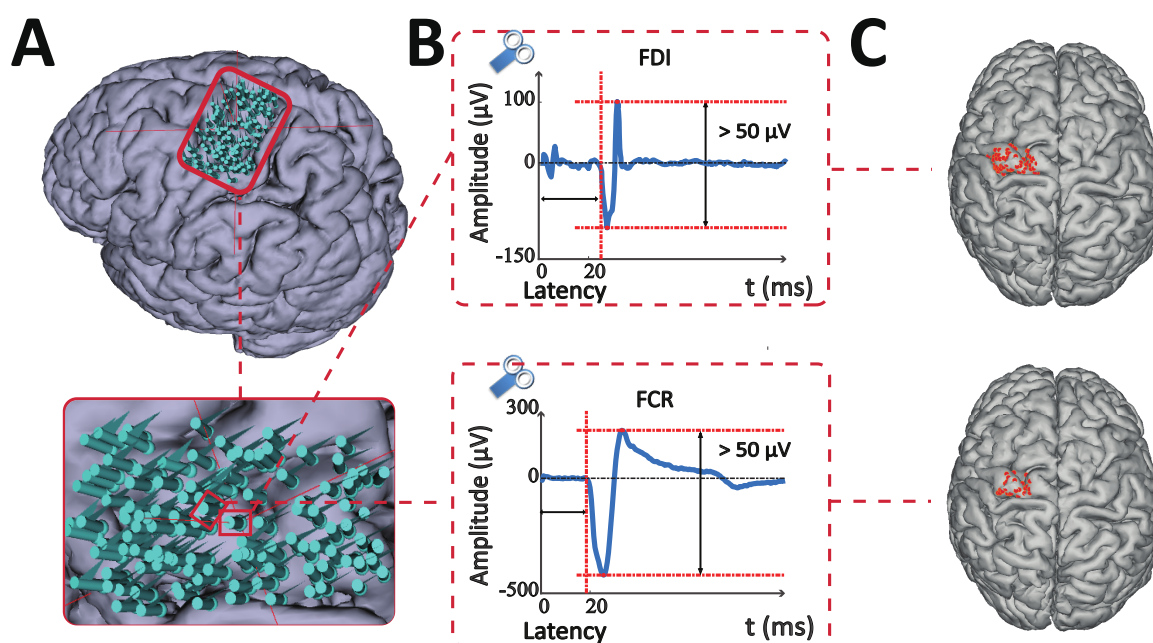

**Figure 2.** The schematic illustrates the procedures of the experiment and data analysis. (A) The gyrus-based method is illustrated by the points of stimulation projected on subjects' pial MRI surface in the neural navigation system in the above picture. The two points highlighted in the lower panel inlet represent the points of the FDI and FCR representation, respectively, corresponding to the motor evoked potentials (MEPs) shown in column (B): top = FDI, bottom = FCR. The MEPs were defined as the peak-to-peak value of the EMG signal under the provision that it exceeded 50μV and the latency was between 15 to 30 ms. (C) The cortical representations of FDI and FCR, i.e., the muscle-specific points shown in column (A) with proper MEPs.

## 155 Statistics

156 All statistical analyses were conducted in Matlab. First, we calculated the average values of RMTs over  
157 all the subjects and sessions of the eight muscles. Possible differences of RMTs across the eight mus-  
158 cles were assessed using a two-way repeated ANOVA with *Muscle* and *Session* as factors, with the  
159 consecutive post-hoc assessment after Bonferroni correction. To evaluate the validity of the gyrus-  
160 based protocol as compared to the grid-based one, we used Bland-Altman plots analysing the ampli-  
161 tude, latency,  $CoG_{x,y,z}$ , and the size of the active area. We did this only for the parameters of the  
162 muscles that were targeted with the specific intensity, i.e., we compared the grid-based and the gyrus-  
163 based protocol to map the cortical representations of FDI at 105% RMT of FDI, etc. To test the relia-  
164 bility of our gyrus-based protocol, we used intraclass correlation coefficients (ICC) between Session 1  
165 and Session 2. These were calculated for the MEP amplitude and latency, the  $CoG_{x,y,z}$ , and the size of  
166 the active area. Effects of stimulation intensity were investigated by estimating the ICCs for all MEP  
167 parameters. For the sake of legibility, however, we defined distinct classes of reliability by discretising  
168 the ICC-values as follows: Excellent:  $0.8 \leq ICC$ ; Good:  $0.65 \leq ICC < 0.8$ ; Moderate:  $0.5 \leq ICC < 0.65$ ; Poor:  
169  $ICC < 0.5$  [20]. We also performed a two-way repeated measures ANOVA with the factors of *Intensity*  
170 and *Session* on all the parameters (again with Bonferroni correction for multiple comparisons). Prior



171 to hypothesis testing, sphericity was verified via Mauchly's test and, if applicable a Greenhouse-  
172 Geisser correction was performed. The significance threshold was set to  $\alpha = .05$ .

## 173 **Results**

174 All  $N = 20$  participants completed the experimental procedure without adverse reactions. Overall, of  
175 20 subjects  $\times$  8 muscles  $\times$  3 intensities  $\times$  2 sessions=960 cortical representations, only 1.77% did not  
176 elicit proper MEPs (11 of 320 stimulations in the intensity of 105% RMT of FDI, 5 of 320 stimulations  
177 in the 105% RMT of EDC and 1 of 320 stimulations in the intensity of 105% RMT of FCR; see Table S1  
178 in the *Supplementary Material* for more details). For five subjects we could not detect MEPs for ADM  
179 when using the second intensity in both sessions.

### 180 *Resting motor thresholds*

181 For all the participants and sessions, the average RMTs of the eight muscles were: FDI ( $44.90 \pm 1.46\%$ ),  
182 ADM ( $47.90 \pm 1.64\%$ ), APB ( $46.15 \pm 1.45\%$ ), FPB ( $46.78 \pm 1.73\%$ ), EDC ( $45.28 \pm 1.50\%$ ), FDS ( $47.75 \pm 1.51\%$ ),  
183 ECR ( $46.55 \pm 1.50\%$ ) and FCR ( $48.00 \pm 1.52\%$ ). The repeated ANOVA revealed a significant effect of *Mus-*  
184 *cle* ( $F(7,133) = 3.63$ ,  $p = .001$ ). There was no significant effect of *Session* ( $F(1,19) = 0.85$ ,  $p = .369$ ) or  
185 interaction between *Muscle* and *Session* ( $F(7,133) = 1.69$ ,  $p = .118$ ). Post-hoc pairwise comparisons in-  
186 dicated significant differences between EDC-FCR ( $p = .020$ ) and FDI-FCR ( $p = .005$ ) in RMTs.

### 187 *Validity of the gyrus-based mapping*

188 In the validation study, we performed grid- and gyrus-based protocols to map the cortical represen-  
189 tations of FDI (intensity of 105% RMT of FDI), EDC (intensity of 105% RMT of EDC) and FCR (intensity  
190 of 105% RMT of FCR) in Session 1; cf. Figure 3 and Figure S1 in the *Supplementary Material*. The dif-  
191 ferences in  $CoG_{x,y,z}$  between grid- and gyrus-based mapping was  $\pm 5$ mm for most subjects in all three  
192 intensities, without systematic effect for the  $CoG_{x,y,z}$  location. The amplitude differences between  
193 the two protocols were usually in the region of  $\pm 100 \mu V$ , while the latency differences were typically  
194 in the range of  $\pm 1.5$ ms for all the subjects. The size of the active area showed larger differences be-  
195 tween grid- and gyrus-based mapping, with the analysis of the slope indicating that the differences in  
196 the size of the active area between the two methods increased when the active area increased (test  
197 for slopes, FDI  $t(18) = 2.91$ ,  $p = .010$ , EDC  $t(20) = 4.00$ ,  $p = .0008$ , and FCR  $t(20) = 3.89$ ,  $p = .001$ ); see  
198 Figure S1 in the *Supplementary Material* for more details.

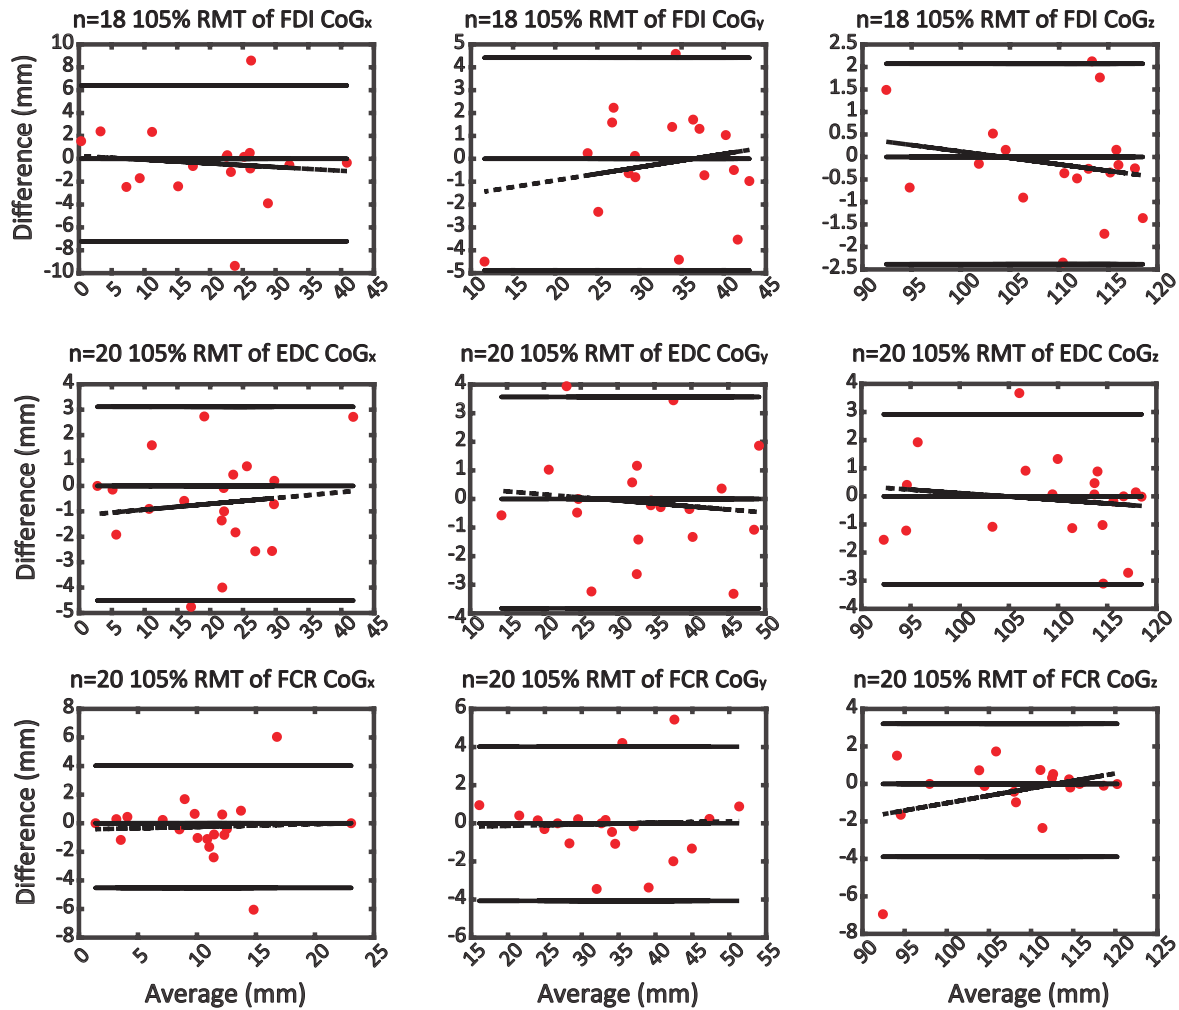

**Figure 3.** Comparisons of the grid- and the gyrus-based protocols. The panels show the Bland-Altman plots for the parameters of  $CoG_{x,y,z}$  for the three intensities. The coloured points represent the difference between the results of the gyrus- and grid-based protocol.

199 *Between session reliability*

200 Table 1 provides an overview of the ICCs of the gyrus-based mapping between Session 1 and 2 of the  
 201 MEP amplitude and latency, as well as of the  $CoG_{x,y,z}$  and the size of the active area for the stimulation  
 202 intensity based on EDC-RMT. ICC values for the mappings based on the other muscles RMT are shown  
 203 in Table S2 and Table S3 in the *Supplementary Material*.

**Table 1.** Intraclass correlation coefficients (ICCs) indicating the reliability of the estimated MEP amplitude and latency and  $CoG_{x,y,z}$  and the size of the active area at stimulation intensity of 105% RMT of EDC.

|             | FDI  | ADM  | APB  | FPB  | EDC  | FDS  | ECR  | FCR  |
|-------------|------|------|------|------|------|------|------|------|
| Amplitude   | 0.93 | 0.83 | 0.78 | 0.87 | 0.84 | 0.84 | 0.98 | 0.77 |
| Latency     | 0.97 | 0.91 | 0.65 | 0.59 | 0.80 | 0.82 | 0.92 | 0.84 |
| $CoG_x$     | 0.85 | 0.84 | 0.86 | 0.86 | 0.88 | 0.86 | 0.87 | 0.85 |
| $CoG_y$     | 0.70 | 0.79 | 0.78 | 0.82 | 0.76 | 0.76 | 0.74 | 0.74 |
| $CoG_z$     | 0.87 | 0.88 | 0.88 | 0.91 | 0.89 | 0.92 | 0.87 | 0.88 |
| Active area | 0.63 | 0.64 | 0.65 | 0.75 | 0.43 | 0.58 | 0.77 | 0.48 |



205 In Figure 4, we illustrate the cortical representations of the eight muscles in Figure 4 based on EDC-  
 206 RMT. Please note that Figures S2 and S3 in the *Supplementary Materials* show the cortical represen-  
 207 tations based on FDI-RMT and FCR-RMT.

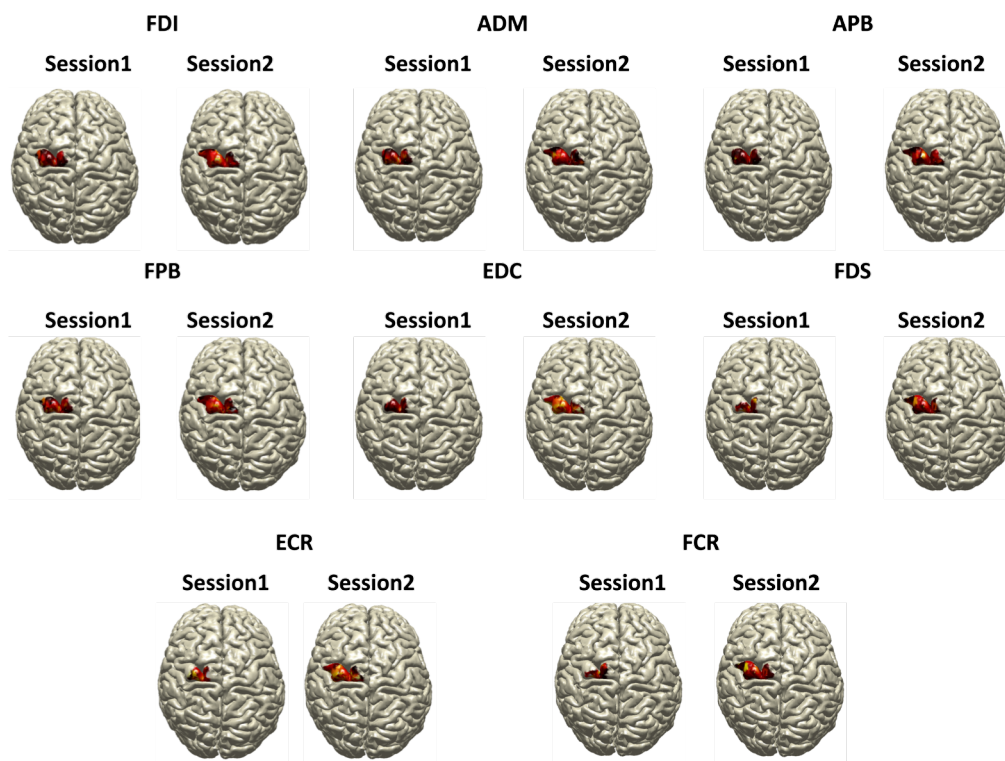

**Figure 4.** Cortical representation of the eight muscles in a representative subject for the intensity of 105% RMT of EDC. The cortical representation from Session 1 is depicted on the left panel, whereas the cortical representation from Session 2 is depicted on the right panel. MEP amplitudes colour-code the active area.

### 208 *Reliability of gyrus-based mapping at different intensities*

209 The reliability of gyrus-based mapping at different stimulation intensities is summarised in Table 2.  
 210 The MEP-responses (across parameters) showed an excellent agreement in intensity 105% RMT of  
 211 EDC, and the ICCs of latency performed almost excellent consistent for a stimulation intensity of 105%  
 212 RMT of EDC and FCR. The ICCs for in  $CoG_{x,y,z}$  at all the intensities were in the range of good to excel-  
 213 lent.

**Table 2.** The number of muscles in the four levels of ICCs cross the three intensities. ICC was interpreted as follows: <0.5 = poor, 0.5-0.64 = moderate, 0.65-0.79= good and >=0.8 was excellent.

|         |                  | Excellent | Good | Moderate | Poor |
|---------|------------------|-----------|------|----------|------|
| Amp.    | 105 % RMT of FDI | 4         | 4    | 0        | 0    |
|         | 105 % RMT of EDC | 6         | 2    | 0        | 0    |
|         | 105 % RMT of FCR | 3         | 3    | 1        | 1    |
| Latency | 105 % RMT of FDI | 3         | 3    | 1        | 1    |
|         | 105 % RMT of EDC | 6         | 1    | 1        | 0    |
|         | 105 % RMT of FCR | 7         | 0    | 0        | 1    |

|             |                  |   |   |   |   |
|-------------|------------------|---|---|---|---|
| $CoG_x$     | 105 % RMT of FDI | 8 | 0 | 0 | 0 |
|             | 105 % RMT of EDC | 8 | 0 | 0 | 0 |
|             | 105 % RMT of FCR | 8 | 0 | 0 | 0 |
| $CoG_y$     | 105 % RMT of FDI | 8 | 0 | 0 | 0 |
|             | 105 % RMT of EDC | 1 | 7 | 0 | 0 |
|             | 105 % RMT of FCR | 0 | 8 | 0 | 0 |
| $CoG_z$     | 105 % RMT of FDI | 8 | 0 | 0 | 0 |
|             | 105 % RMT of EDC | 8 | 0 | 0 | 0 |
|             | 105 % RMT of FCR | 8 | 0 | 0 | 0 |
| Active area | 105 % RMT of FDI | 0 | 1 | 6 | 1 |
|             | 105 % RMT of EDC | 0 | 3 | 3 | 2 |
|             | 105 % RMT of FCR | 0 | 3 | 3 | 2 |

214 We did not find any significant effects of *Intensity* or *Session* (nor of their interaction) on  $CoG_{x,y,z}$  (see  
 215 also Table S4 in the *Supplementary Material*). However, the size of the active area for each muscle  
 216 differed significantly across intensities, without significant effects of *Session* or *Intensity*  $\times$  *Session* in-  
 217 teraction. The post-hoc pairwise comparisons revealed that the active area tested in the intensity of  
 218 105% RMT of FCR was markedly larger than in the other intensities; cf. Table 3. For several muscles,  
 219 the amplitude and latency varied significantly across the intensities (see Table S4 in the *Supplementary*  
 220 *Material* for details).

**Table 3.** The statistical results of the size of the active area: the average values, the outcomes of the repeated ANOVA (for the factors of *Intensity*, *Session* and *Intensity* $\times$ *Session*) and the pairwise comparisons in the intensity 105% RMT of FDI ~ 105% RMT of EDC, 105% RMT of FDI ~ 105% RMT of FCR and 105% RMT of EDC ~ 105% RMT of FCR.

|     | Average of active area (mm <sup>3</sup> ) |                    |                    | <i>Intensity</i> |                 | <i>Session</i> |                 | <i>Intensity</i> $\times$ <i>Session</i> |                 | p-value of pairwise comparisons |                    |                    |
|-----|-------------------------------------------|--------------------|--------------------|------------------|-----------------|----------------|-----------------|------------------------------------------|-----------------|---------------------------------|--------------------|--------------------|
|     | 105% RMT of FDI                           | 105% RMT of EDC    | 105% RMT of FCR    | $F(2,34)$        | <i>p</i> -value | $F(1,17)$      | <i>p</i> -value | $F(2,34)$                                | <i>p</i> -value | 105% RMT FDI ~ EDC              | 105% RMT FDI ~ FCR | 105% RMT EDC ~ FCR |
| FDI | 619.61 $\pm$ 65.32                        | 711.47 $\pm$ 62.73 | 966.43 $\pm$ 77.85 | 8.798            | <b>0.0008</b>   | 0.181          | 0.676           | 0.385                                    | 0.684           | 0.750                           | <b>0.006</b>       | <b>0.023</b>       |
| ADM | 439.54 $\pm$ 80.66                        | 495.22 $\pm$ 73.36 | 688.80 $\pm$ 86.01 | 4.735            | <b>0.015</b>    | 0.781          | 0.389           | 0.057                                    | 0.945           | 1.000                           | 0.061              | 0.131              |
| APB | 576.17 $\pm$ 91.58                        | 619.43 $\pm$ 68.58 | 885.56 $\pm$ 66.29 | 6.515            | <b>0.004</b>    | 0.011          | 0.918           | 0.748                                    | 0.481           | 1.000                           | <b>0.024</b>       | <b>0.027</b>       |
| FPB | 580.83 $\pm$ 98.33                        | 661.24 $\pm$ 79.00 | 878.70 $\pm$ 69.46 | 6.177            | <b>0.005</b>    | 0.299          | 0.592           | 0.287                                    | 0.752           | 0.859                           | 0.859              | 0.062              |
| EDC | 652.80 $\pm$ 94.43                        | 694.80 $\pm$ 59.15 | 933.34 $\pm$ 89.09 | 6.391            | <b>0.004</b>    | 0.861          | 0.366           | 0.039                                    | 0.962           | 1.000                           | <b>0.029</b>       | <b>0.024</b>       |
| FDS | 565.54 $\pm$ 83.40                        | 583.56 $\pm$ 70.26 | 834.56 $\pm$ 76.11 | 5.642            | <b>0.008</b>    | 4.145          | 0.058           | 0.513                                    | 0.603           | 1.000                           | <b>0.026</b>       | <b>0.045</b>       |
| ECR | 572.26 $\pm$ 95.14                        | 567.46 $\pm$ 73.18 | 871.06 $\pm$ 82.29 | 8.216            | <b>0.001</b>    | 0.365          | 0.554           | 0.023                                    | 0.978           | 1.000                           | <b>0.009</b>       | <b>0.005</b>       |
| FCR | 531.05 $\pm$ 89.14                        | 530.23 $\pm$ 76.39 | 791.67 $\pm$ 78.86 | 5.201            | <b>0.011</b>    | 1.745          | 0.204           | 0.518                                    | 0.601           | 1.000                           | <b>0.028</b>       | 0.062              |

## 221 Discussion

222 We designed a protocol to investigate the cortical representation of multiple muscles using navigated  
 223 single-pulse TMS. Conventional grid-based mapping and our gyrus-based mapping were performed  
 224 using three stimulation intensities in two consecutive sessions. We determined RMTs of eight muscles  
 225 as well as MEP amplitudes and latencies, the centre-of-gravity and the size of the corresponding active  
 226 areas. We found that our new protocol is as valid and as reliable as the commonly applied grid-based  
 227 approach but appears much more feasible. Our protocol reduces assessment times and simplifies ex-

228 experimental procedures. In our experiment, it took only about 10 minutes to map eight muscles simul-  
229 taneously (5 second intervals  $\times$  120 points / 60), while for the conventional grid-based approach with  
230 serial muscle assessment, at least 80 minutes would be spent. Experimenting over such a long period  
231 is prone to navigational errors and aggravates participants' fatigue. Moreover, by construction sepa-  
232 rate measurements will not provide reliable insight about overlapping cortical muscle representations.

233 One of the problems in designing multiple muscles mapping is that the RMT of a single muscle is con-  
234 sidered a reference when setting the stimulation intensity. We found that the RMTs of the hand and  
235 forearm muscles considered are indeed marginally different (EDC-FCR and FDI-FCR). The average  
236 RMTs indicated that the difference between RMTs is small (not more than 3.1% of stimulator output).  
237 Intensities of 105%, 110% to 120% [27] RMT have been widely used in motor mapping [8, 27, 28],  
238 suggesting that the here-observed difference is acceptable if not negligible. Hence, forearm and hand  
239 muscles might be pooled in a group of muscles with "similar RMTs" and may indeed be evaluated at  
240 the same intensity.

241 The validity testing clearly revealed that our gyrus-based mapping agrees with the grid-based standard,  
242 consistent with a previous study on pseudorandom stimulus positioning [20, 29]. The variation of  
243  $CoG_{x,y,z}$  values between the two protocols was restricted to a range of about -4mm to 4mm. The  
244 differences in size of the active area between protocols are more considerable, and the between-  
245 subjects variability is clearly noteworthy. One explanation for this is that any outlier stimulation site  
246 may strongly affect the estimate of the active area. Moreover, the individual MRIs profoundly differed  
247 in size. While the first calls for more statistical evaluation and (spatial) outlier detection, the latter will  
248 soon be addressed by projecting the individual MRI to, e.g., the MNI template [13].

249 The reliability of amplitude and latency were excellent or good for all the muscles and all the param-  
250 eters analysed in APB and ECR achieved excellent to good ICCs, indicating the required reliability of  
251 our approach. The ICC values of the size of the active area in FDI, ADM, EDC and FCR were moderate  
252 to poor. This may be related to the factors. First, in some participants, the RMTs of these muscles were  
253 higher than the intensities we set. That is, the intensity of stimulation was too low to activate the  
254 corresponding cortical areas. Second, one must realise that even a figure-of-eight coil comes with a  
255 widespread focus. Hence, TMS activates not isolated but also nearby areas. Yet, the estimated centres-  
256 of-gravity appeared very consistent and should be considered reliable parameters in motor mapping,  
257 in line with previous studies [20, 21].

258 A gyrus-based protocol with nTMS for multiple muscles allows for not just assessing multiple muscles  
259 in parallel, especially when stepping away from mere "active point" drawing [30] to estimating muscle-

260 specific active areas in detail. Isolated muscles are not mapped to isolated cortical areas, but one de-  
261 termines the cortical representation of a set of muscles. Results show that these cortical representa-  
262 tion manifest overlaps that diverges across the muscles [31]; cf. Figure 4. This comes particularly to  
263 the fore when analysing cortical surfaces in 3D. There are several methods to determine mapping  
264 areas using nTMS [19, 32] that stand out for their computational ease. However, by ignoring the 3D  
265 representation of surface folds, one runs the risk of missing important information about active areas  
266 in the gyri vis-à-vis the sulci. We used a 3D-alternative (as explained in the *Supplementary Material*)  
267 that overcomes these potential shortcomings. This also provides a welcome visualisation of the active  
268 area on the cortex (for single or multiples muscles), which might serve as a convenient tool. In future  
269 research, we will exploit its capacity to unravel the nature of the overlap region of active areas of  
270 multiple muscles.

271 We selected three intensities when eliciting MEPs, namely 105% RMT of FDI as a representative of the  
272 hand muscle, EDC as extensor and FCR for flexor muscles. Despite the small variation in RMTs of all  
273 muscles, one may still consider this sub-optimal. Image-based RMT prediction may be an excellent  
274 way to address this issue. This should involve modelling the electric field distributions of TMS, which  
275 may also serve to quantify overlapping cortical representation with even higher precision than cur-  
276 rently possible.

## 277 **Conclusion**

278 We designed a time-efficient protocol for identifying the cortical representation of multiple muscles  
279 in parallel. Our procedure takes only about ten minutes per subject when including eight muscles. The  
280 results of the active area's centre-of-gravity at three distinct stimulation intensities can be considered  
281 very reliable. All the here-considered outcome parameters confirm the validity of the procedure when  
282 compared to a conventional, grid-based approach with muscle-specific resting motor threshold-scaled  
283 stimulation intensities.

## 284 **Acknowledgements**

285 The authors are thankful to Moira van Leeuwen, who provided assistance during the measurements.  
286 Sjoerd Bruijn was funded by a grant from the Netherlands Organization for Scientific Research  
287 (016.Vidi.178.014), <https://www.nwo.nl/en/>.

288

## 289 References

- 290 [1] Barker AT, Jalinous R, Freeston IL. Non-invasive magnetic stimulation of human motor cortex. *The Lancet*  
291 1985;325(8437):1106-7.
- 292 [2] Schambra H, Sawaki L, Cohen L. Modulation of excitability of human motor cortex (M1) by 1 Hz transcranial  
293 magnetic stimulation of the contralateral M1. *Clinical Neurophysiology* 2003;114(1):130-3.
- 294 [3] Rossini PM, Burke D, Chen R, Cohen L, Daskalakis Z, Di Iorio R, et al. Non-invasive electrical and magnetic  
295 stimulation of the brain, spinal cord, roots and peripheral nerves: basic principles and procedures for rou-  
296 tine clinical and research application. An updated report from an IFCN Committee. *Clinical Neurophysiology*  
297 2015;126(6):1071-107.
- 298 [4] Rossini PM, Barker A, Berardelli A, Caramia M, Caruso G, Cracco R, et al. Non-invasive electrical and mag-  
299 netic stimulation of the brain, spinal cord and roots: basic principles and procedures for routine clinical  
300 application. Report of an IFCN committee. *Electroencephalography and clinical neurophysiology*  
301 1994;91(2):79-92.
- 302 [5] Siebner H, Rothwell J. Transcranial magnetic stimulation: new insights into representational cortical plas-  
303 ticity. *Experimental brain research* 2003;148(1):1-16.
- 304 [6] Krieg SM, Shiban E, Buchmann N, Gempt J, Foerschler A, Meyer B, et al. Utility of presurgical navigated  
305 transcranial magnetic brain stimulation for the resection of tumors in eloquent motor areas. *Journal of*  
306 *neurosurgery* 2012;116(5):994-1001.
- 307 [7] Mark V, Taub E, Morris D. Neuroplasticity and constraint-induced movement therapy. *Europa medicophys-*  
308 *ica* 2006;42(3):269.
- 309 [8] Tarapore PE, Tate MC, Findlay AM, Honma SM, Mizuiri D, Berger MS, et al. Preoperative multimodal motor  
310 mapping: a comparison of magnetoencephalography imaging, navigated transcranial magnetic stimulation,  
311 and direct cortical stimulation. *Journal of neurosurgery* 2012;117(2):354-62.
- 312 [9] Forster M-T, Hattingen E, Senft C, Gasser T, Seifert V, Szelényi A. Navigated transcranial magnetic stimula-  
313 tion and functional magnetic resonance imaging: advanced adjuncts in preoperative planning for central  
314 region tumors. *Neurosurgery* 2011;68(5):1317-25.
- 315 [10] Melgari J-M, Pasqualetti P, Pauri F, Rossini PM. Muscles in "concert": study of primary motor cortex upper  
316 limb functional topography. *PloS one* 2008;3(8):e3069.
- 317 [11] Wassermann EM, McShane LM, Hallett M, Cohen LG. Noninvasive mapping of muscle representations in  
318 human motor cortex. *Electroencephalography and Clinical Neurophysiology/Evoked Potentials Section*  
319 1992;85(1):1-8.
- 320 [12] Gugino LD, Romero JR, Aglio L, Titone D, Ramirez M, Pascual-Leone A, et al. Transcranial magnetic stimula-  
321 tion coregistered with MRI: a comparison of a guided versus blind stimulation technique and its effect on  
322 evoked compound muscle action potentials. *Clinical neurophysiology* 2001;112(10):1781-92.
- 323 [13] Kraus D, Gharabaghi A. Projecting navigated TMS sites on the gyral anatomy decreases inter-subject varia-  
324 bility of cortical motor maps. *Brain stimulation* 2015;8(4):831-7.
- 325 [14] Vink JJ, Petrov PI, Mandija S, Dijkhuizen RM, Neggers SF. Outcome of TMS-based motor mapping depends  
326 on TMS current direction. *bioRxiv* 2018:371997.
- 327 [15] Julkunen P, Säisänen L, Danner N, Niskanen E, Hukkanen T, Mervaala E, et al. Comparison of navigated and  
328 non-navigated transcranial magnetic stimulation for motor cortex mapping, motor threshold and motor  
329 evoked potentials. *Neuroimage* 2009;44(3):790-5.
- 330 [16] Krieg SM, Lioumis P, Mäkelä JP, Wilenius J, Karhu J, Hannula H, et al. Protocol for motor and language  
331 mapping by navigated TMS in patients and healthy volunteers; workshop report. *Acta neurochirurgica*  
332 2017;159(7):1187-95.
- 333 [17] Kleim JA, Kleim ED, Cramer SC. Systematic assessment of training-induced changes in corticospinal output  
334 to hand using frameless stereotaxic transcranial magnetic stimulation. *Nature Protocols* 2007;2(7):1675.

- 335 [18] Littmann AE, McHenry CL, Shields RK. Variability of motor cortical excitability using a novel mapping pro-  
336 cedure. *Journal of neuroscience methods* 2013;214(2):137-43.
- 337 [19] Van De Ruit M, Perenboom MJ, Grey MJ. TMS brain mapping in less than two minutes. *Brain stimulation*  
338 2015;8(2):231-9.
- 339 [20] Cavaleri R, Schabrun SM, Chipchase LS. The reliability and validity of rapid transcranial magnetic stimulation  
340 mapping. *Brain stimulation* 2018.
- 341 [21] Weiss C, Nettekoven C, Rehme AK, Neuschmelting V, Eisenbeis A, Goldbrunner R, et al. Mapping the hand,  
342 foot and face representations in the primary motor cortex—retest reliability of neuronavigated TMS versus  
343 functional MRI. *Neuroimage* 2013;66:531-42.
- 344 [22] Rossi S, Hallett M, Rossini PM, Pascual-Leone A. Screening questionnaire before TMS: an update. 2011.
- 345 [23] Oldfield RC. The assessment and analysis of handedness: the Edinburgh inventory. *Neuropsychologia*  
346 1971;9(1):97-113.
- 347 [24] Groppa S, Oliviero A, Eisen A, Quartarone A, Cohen L, Mall V, et al. A practical guide to diagnostic transcra-  
348 nial magnetic stimulation: report of an IFCN committee. *Clinical Neurophysiology* 2012;123(5):858-82.
- 349 [25] Malcolm M, Triggs W, Light K, Shechtman O, Khandekar G, Rothi LG. Reliability of motor cortex transcranial  
350 magnetic stimulation in four muscle representations. *Clinical neurophysiology* 2006;117(5):1037-46.
- 351 [26] Opitz A, Zafar N, Bockermann V, Rohde V, Paulus W. Validating computationally predicted TMS stimulation  
352 areas using direct electrical stimulation in patients with brain tumors near precentral regions. *NeuroImage:*  
353 *Clinical* 2014;4:500-7.
- 354 [27] Akiyama T, Ohira T, Kawase T, Kato T. TMS orientation for NIRS-functional motor mapping. *Brain topogra-*  
355 *phy* 2006;19(1-2):1-9.
- 356 [28] Bohning D, He L, George M, Epstein C. Deconvolution of transcranial magnetic stimulation (TMS) maps.  
357 *Journal of neural transmission* 2001;108(1):35-52.
- 358 [29] Jonker ZD, van der Vliet R, Hauwert CM, Gaiser C, Tulen JH, van der Geest JN, et al. TMS motor mapping:  
359 Comparing the absolute reliability of digital reconstruction methods to the golden standard. *Brain stimula-*  
360 *tion* 2019;12(2):309-13.
- 361 [30] Seynaeve L, Haeck T, Gramer M, Maes F, De Vleeschouwer S, Van Paesschen W. Optimised preoperative  
362 motor cortex mapping in brain tumors using advanced processing of transcranial magnetic stimulation data.  
363 *NeuroImage: Clinical* 2019;21:101657.
- 364 [31] Mathew J, Kübler A, Bauer R, Gharabaghi A. Probing corticospinal recruitment patterns and functional syn-  
365 ergies with transcranial magnetic stimulation. *Frontiers in cellular neuroscience* 2016;10:175.
- 366 [32] Julkunen P. Methods for estimating cortical motor representation size and location in navigated transcra-  
367 nial magnetic stimulation. *Journal of neuroscience methods* 2014;232:125-33.
- 368
